# Supplementary material for: Influence of the HDPE molecular weight and content on the morphology and properties of the impact polypropylene copolymer/HDPE blends
Source: Royal Society of Chemistry journal article supplement (doi:10.1039/c5ra08517a), 2015-01-01
Supplement: c5ra08517a1.pdf [file c5ra08517a1.pdf]

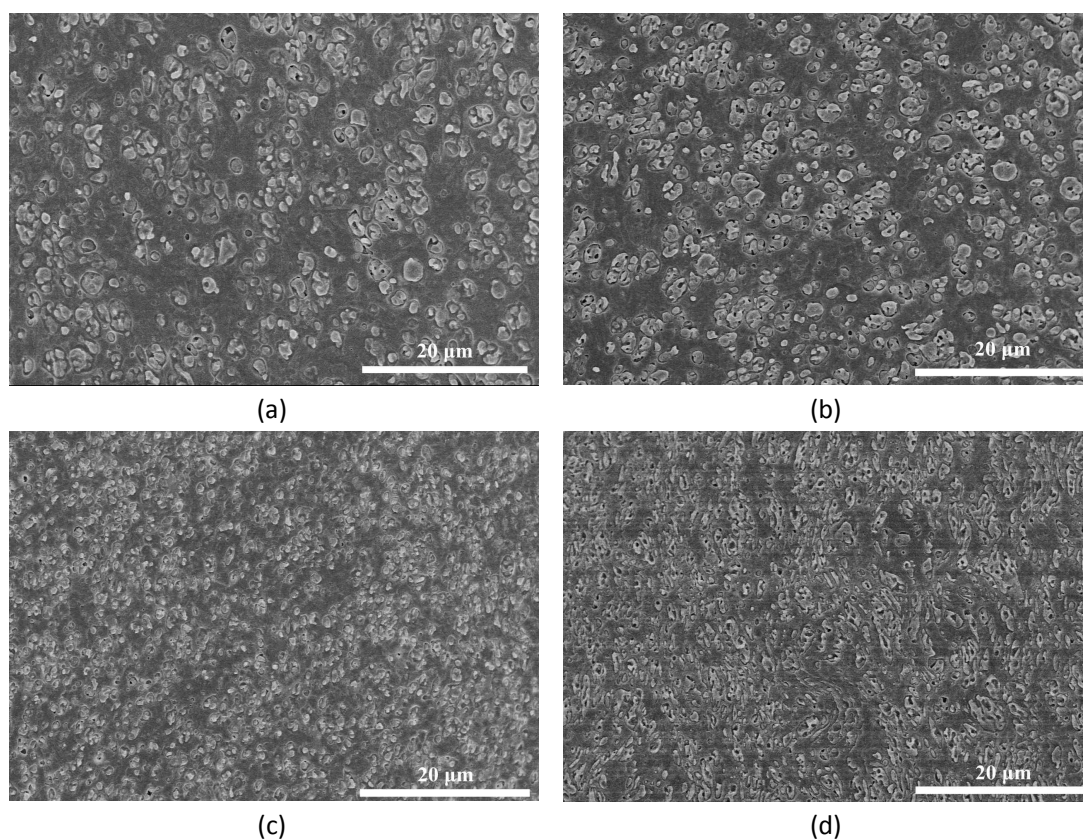

**SFig.1** SEM micrographs of YZ plane of A2 (a), A3 (b), B2 (c) and B3 (d), Z is horizontal.

To determine the  $T_g$  of the EPR, DMA experiment was conducted by TA RSA III in three-point bending mode. Injection molded bar was used for experiment, the heating rate is  $3^\circ\text{C}$  and the frequency is 1Hz. Loss factor-temperature

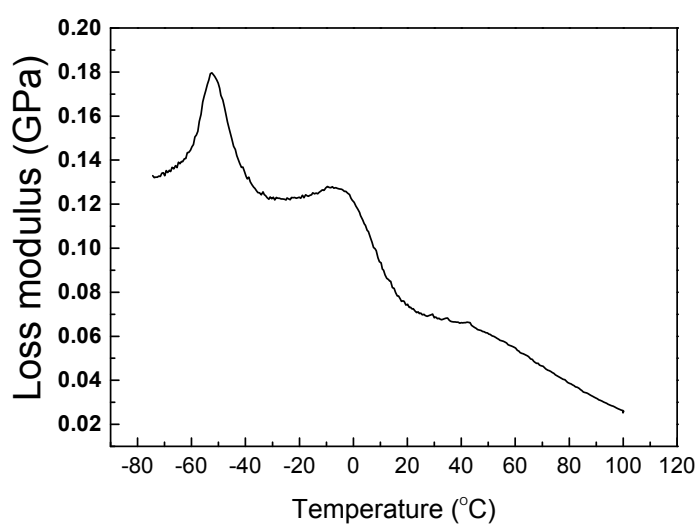

**SFig.2** DMA loss modulus-temperature curves of the IPC.
